# Supplementary material for: Monoclonal Antibodies Specific for SARS-CoV-2 Spike Protein Suitable for Multiple Applications for Current Variants of Concern
Source: MDPI journal article supplement (doi:10.3390/v15010139), 2022-12-31
Supplement: s1 [file s1]

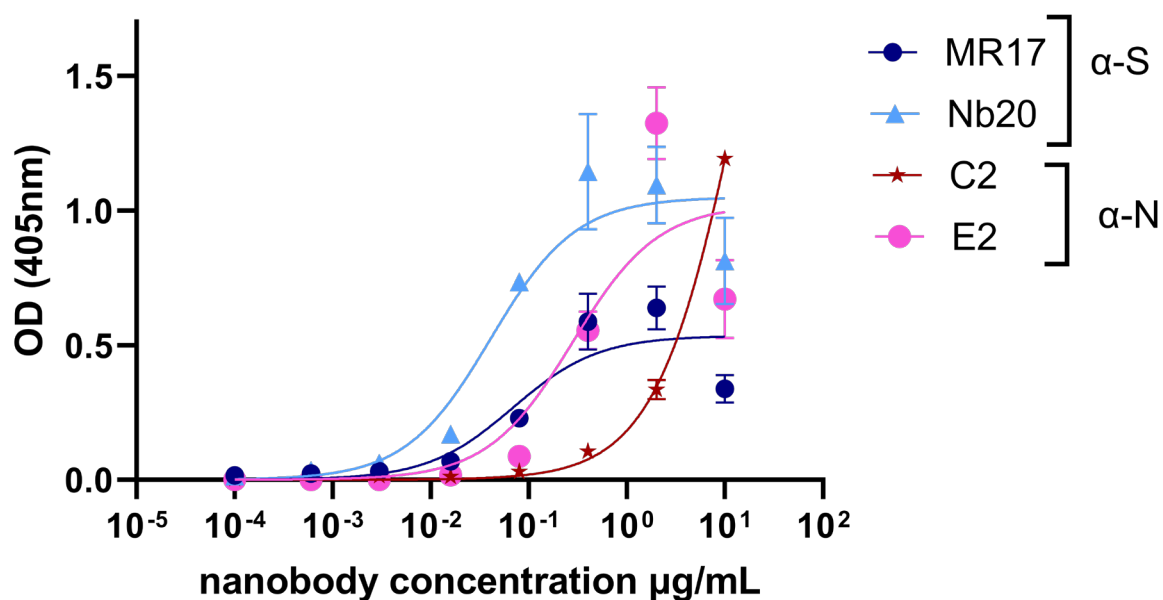

**Supplementary Figure S1.** ELISA titrations using serial dilutions of the indicated purified nanobodies on Vero E6 cells infected with SARS-CoV-2<sub>QLD02</sub> and fixed in 80% acetone. The nanobodies were directed to spike (MR17, Nb20) or nucleocapsid (C2, E2) proteins.

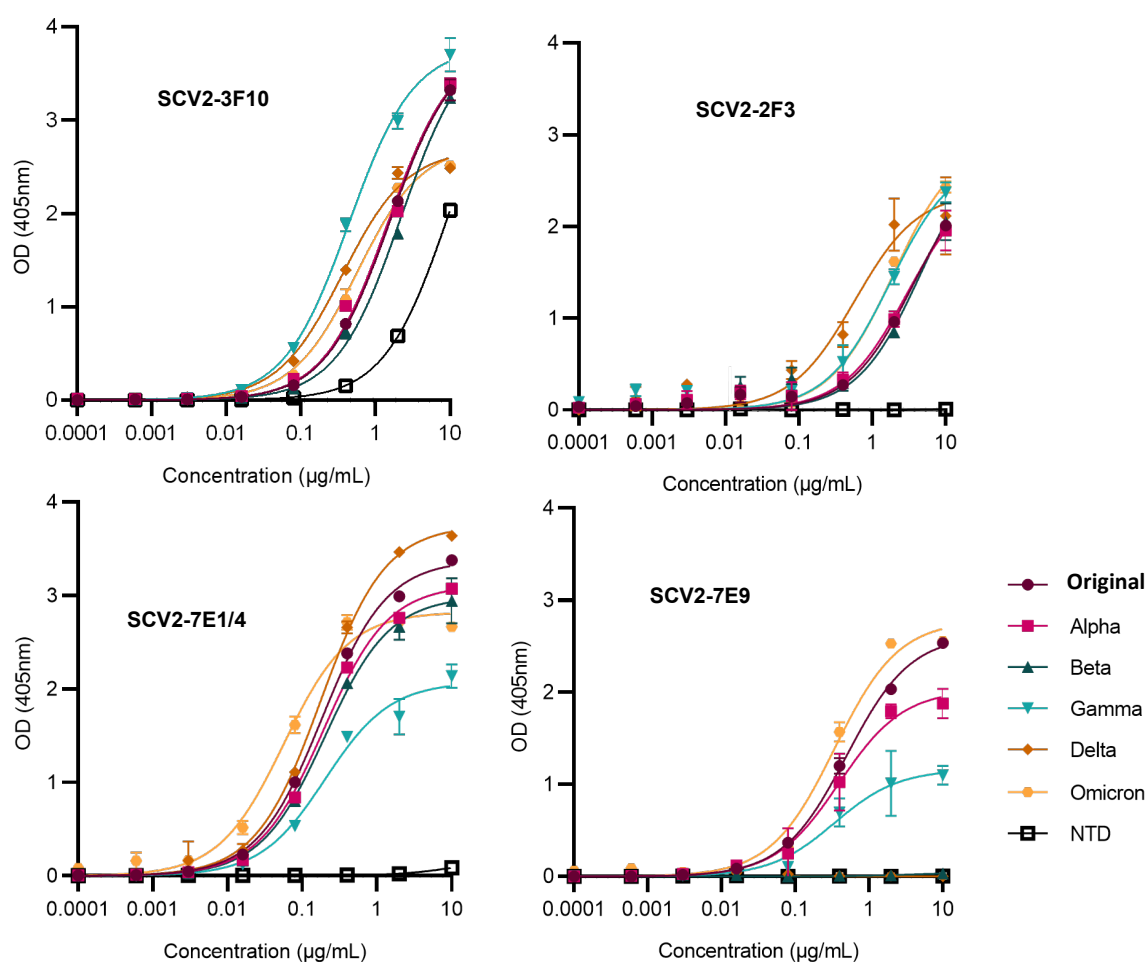

**Supplementary Figure S2.** ELISA titrations (summarised in Table 1) using serial dilutions of the indicated purified mAbs, and as antigens (i) recombinant HexaPro spike proteins with a mutated furin cleavage site from the indicated strains of concern, and (ii) recombinant N-terminal domain (NTD) of Wu-Hu-1 fused to human Fc.

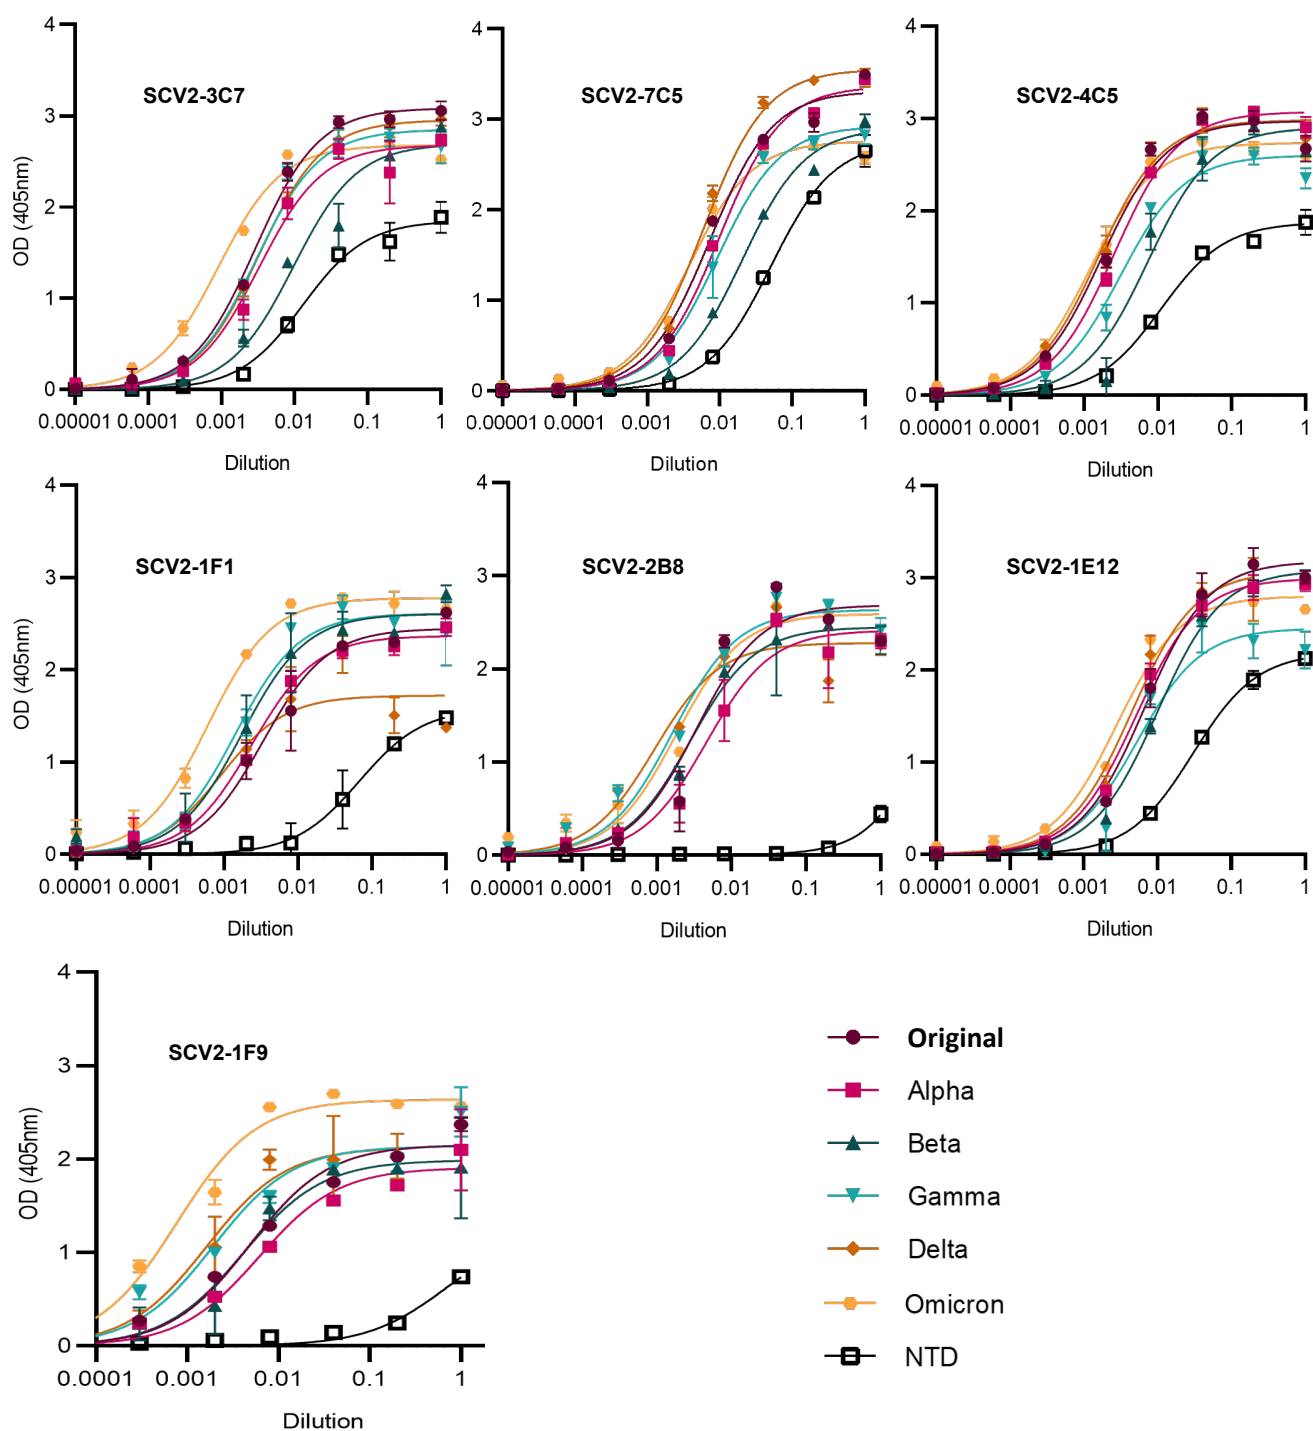

**Supplementary Figure S3.** As for Supplementary Fig. 2 but using the indicated dilutions of mAb tissue culture supernatants (1 represents neat supernatant).

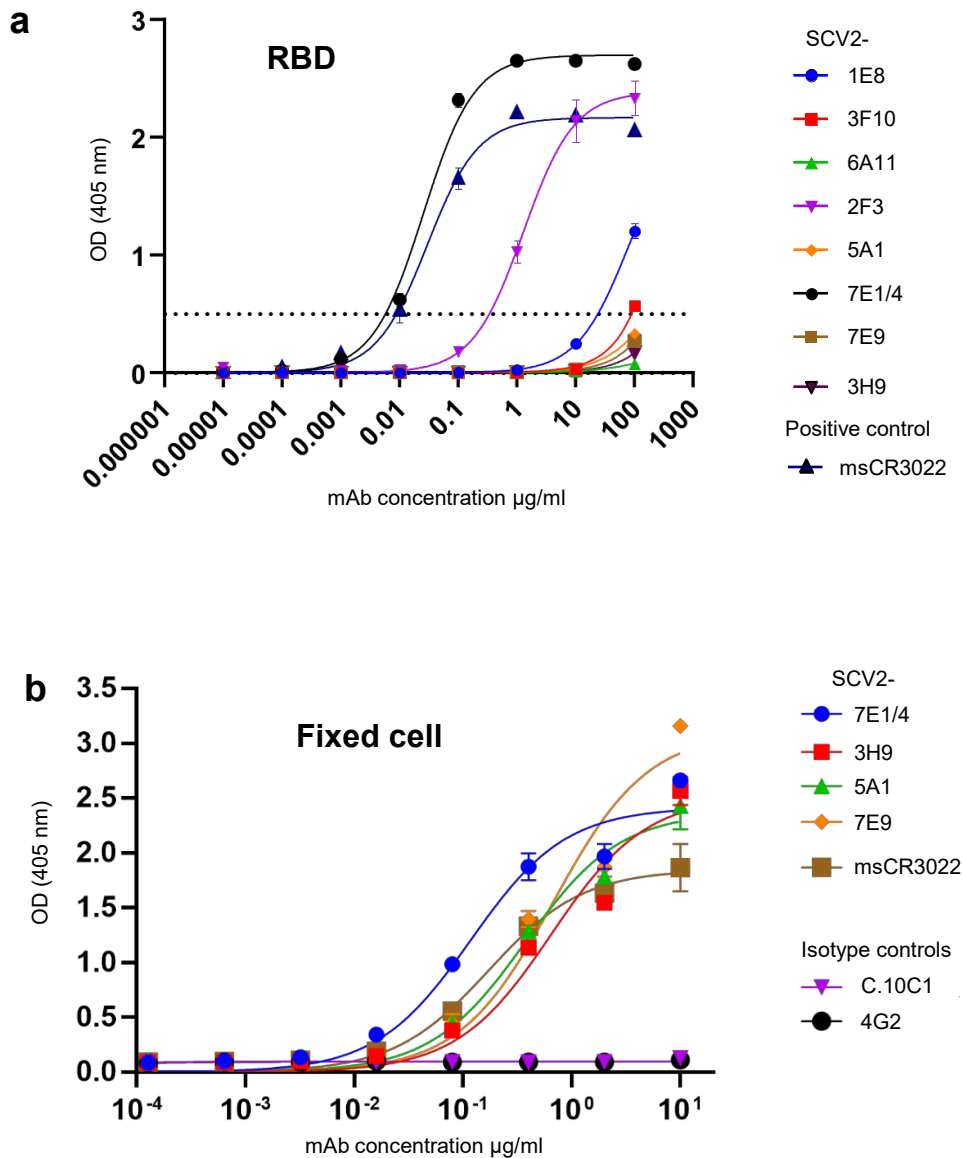

**Supplementary Figure S4.** (a) ELISAs using recombinant RBD (Wu-Hu-1) fused to human Fc as antigen (coating with 2  $\mu\text{g/ml}$ ), and serial dilutions of the indicated mAbs. Data is summarized in Table 1. msCR3022 is a positive control recombinant mouse anti-SARS-CoV-2 spike antibody (Rawle et al., 2021). (b) ELISAs using Vero E6 cells infected with SARS-CoV-2<sub>QLD02</sub> and fixed in 80% acetone.

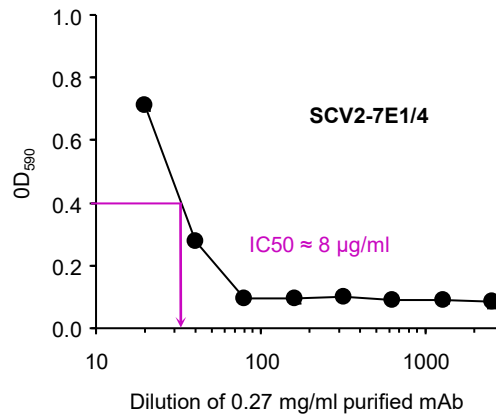

**Supplementary Figure S5.** Neutralisation assay as for Fig. 5. Note low concentration of purified mAb. Data from single replicates only.
